# Supplementary material
Source: publisher figshare collection journal article supplement (https://acs.figshare.com/ndownloader/files/5829309)
Supplement: Supplementary file 1 [file 5829309]

## Aminolysis of Oxoester

*Without Water as Catalyst*

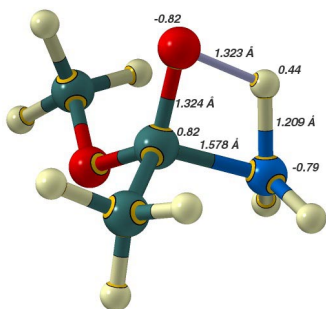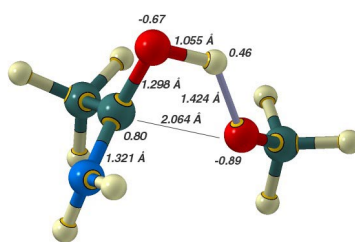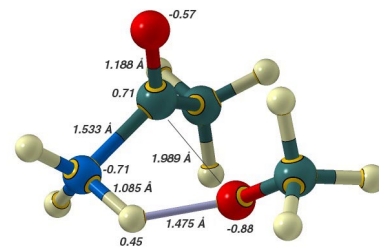

*Concerted*

*Stepwise First Step*

*Stepwise Second Step*

*With Water as Catalyst*

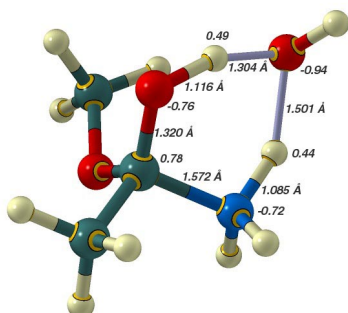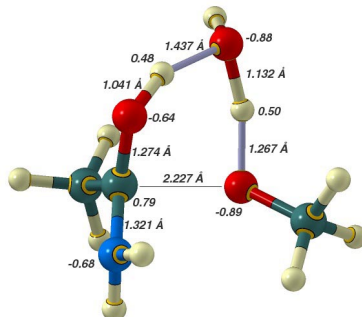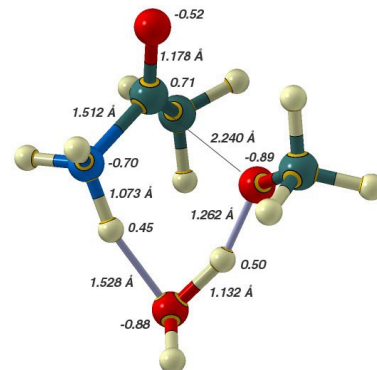

*Concerted*

*Stepwise First Step*

*Stepwise Second Step*

## Aminolysis of Thioester

*Without Water as Catalyst*

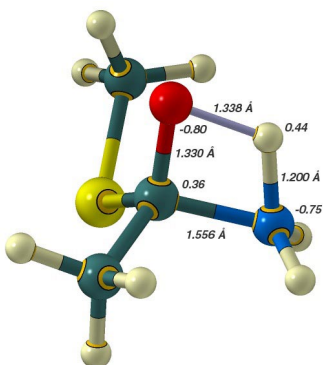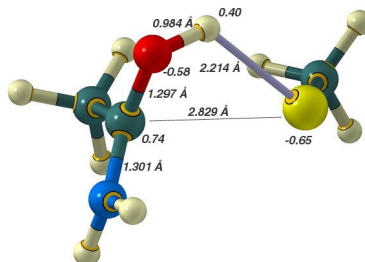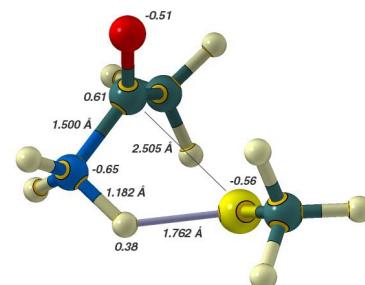

*Concerted*

*Stepwise First Step*

*Stepwise Second Step*

*With Water as Catalyst*

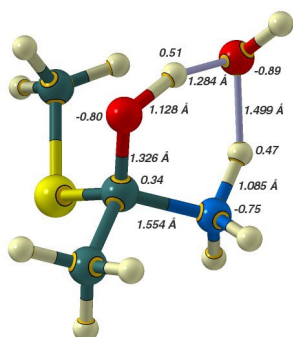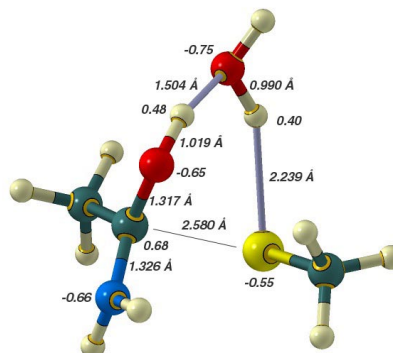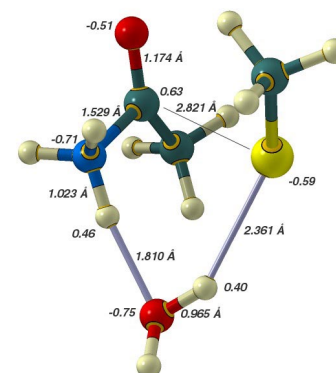

*Concerted*

*Stepwise First Step*

*Stepwise Second Step*
